# Supplementary material
Source: PubMed Central journal article supplement (PMC4747432)
Supplement: NIHMS738397-supplement-1.pdf [file NIHMS738397-supplement-1.pdf]

## Inventory of Supplemental Information

Related to Figure 1:

Figure S1: Phenotypic and functional characterization of low- $\Delta\psi_m$  and high- $\Delta\psi_m$  CD8<sup>+</sup> T cells.

Table S1: List of differentially expressed genes between Tscm and Tem CD8<sup>+</sup> T cells

Related to Figure 2:

Figure S2. Metabolic characterization of low- $\Delta\psi_m$  and high- $\Delta\psi_m$  cells CD8<sup>+</sup> T cells

Table S2: List of differentially expressed genes between low and high membrane potential T cells

Related to Figure 3:

Figure S3 Mitochondrial membrane potential ( $\Delta\psi_m$ )-based sorting in central memory T cell subset ( $T_{CM}$ ) and gene expression profile of  $\Delta\psi_m$   $T_{CM}$  subsets.

Figure S4. Mitochondrial membrane potential based sorting and characterization of  $\Delta\psi_m$  subsets in LT-HSC and bulk CD8<sup>+</sup> T cells

Related to Figure 5

Figure S5. Interleukin-2 augments mitochondrial membrane potential through mTOR signaling
